# Supplementary material for: The effect of specific bioactive collagen peptides on function and muscle remodeling during human resistance training
Source: PubMed Central journal article supplement — Acta Physiol (Oxf). 2022 Dec 13;237(2):e13903. doi: 10.1111/apha.13903 (PMC10078466; doi:10.1111/apha.13903), 2022-12-13
Supplement: APHA-237-0-s002.pdf [file APHA-237-0-s002.pdf]

**A**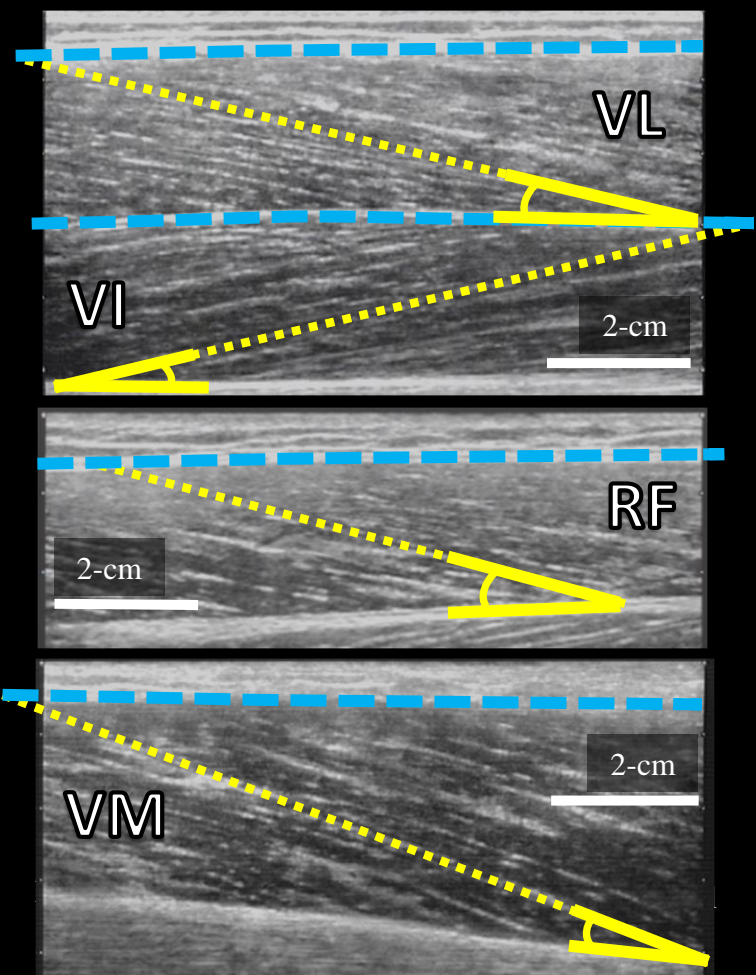Proximal Distal

**Key:** — — — Superficial aponeurosis  
· · · Fascicle length  
A Pennation angle

**B**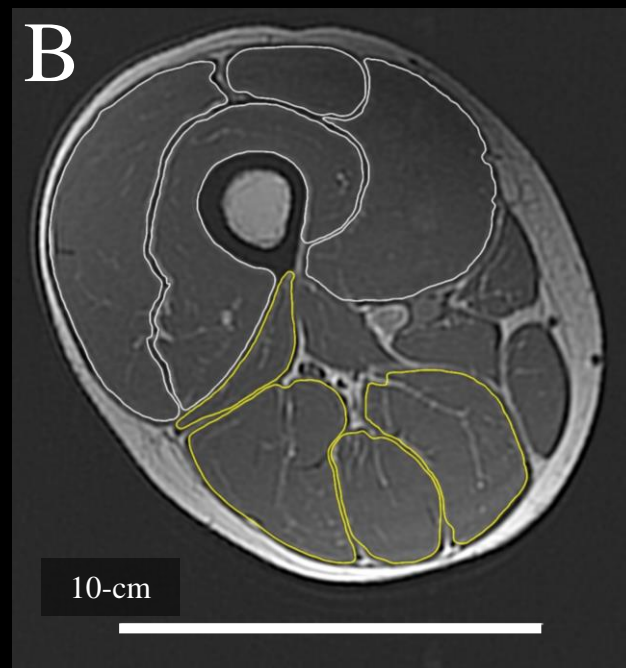**C**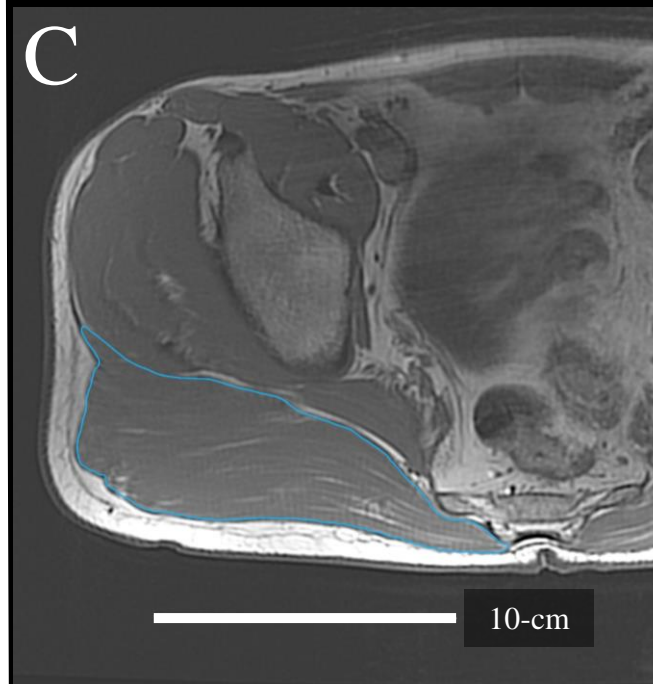

**Supplementary material 4.** Representative: (A) ultrasound images of vastus lateralis (VL; 50% of femur length), vastus intermedius (VI; 50% of femur length), rectus femoris (RF; 55% of femur length), and vastus medialis (VM; 40% of femur length; 0% is knee joint space); (B) axial magnetic resonance image of the thigh with constituent muscles of the quadriceps (white borders) and hamstrings (yellow borders) segmented; and (C) axial magnetic resonance image of the hip with the gluteus maximus (light blue border) segmented.
