# Supplementary material for: The effect of specific bioactive collagen peptides on function and muscle remodeling during human resistance training
Source: PubMed Central journal article supplement — Acta Physiol (Oxf). 2022 Dec 13;237(2):e13903. doi: 10.1111/apha.13903 (PMC10078466; doi:10.1111/apha.13903), 2022-12-13
Supplement: APHA-237-0-s004.pdf [file APHA-237-0-s004.pdf]

**Supplementary material 1.** Sets, load and repetitions performed by all participants across the 15 wk intervention period.

| <b>Week</b> | <b>Knee Extension</b><br>(sets x load and repetitions) | <b>Knee Flexion and Leg Press</b><br>(sets x load and repetitions) |
|-------------|--------------------------------------------------------|--------------------------------------------------------------------|
| 1           | 2 x 12RM                                               | 2 x 12RM                                                           |
| 2           | 3 x 12RM                                               | 2 x 12RM                                                           |
| 3           | 3 x 10RM                                               | 3 x 10RM                                                           |
| 4           | 4 x 10RM                                               | 3 x 10RM                                                           |
| 5           | 4 x 8RM                                                | 3 x 8RM                                                            |
| 6           | 4 x 6RM                                                | 3 x 6RM                                                            |
| 7           | 4 x 12RM                                               | 4 x 12RM                                                           |
| 8           | 4 x 10RM                                               | 4 x 10RM                                                           |
| 9           | 4 x 8RM                                                | 4 x 8RM                                                            |
| 10          | 4 x 6RM                                                | 4 x 6RM                                                            |
| 11          | 4 x 12RM                                               | 4 x 12RM                                                           |
| 12          | 4 x 10RM                                               | 4 x 10RM                                                           |
| 13          | 4 x 8RM                                                | 4 x 8RM                                                            |
| 14          | 4 x 8RM                                                | 4 x 8RM                                                            |
| 15          | 4 x 6RM                                                | 4 x 6RM                                                            |

RM, repetition-maximum
